# Supplementary material for: Optimization and Molecular Mechanism of Novel α-Glucosidase Inhibitory Peptides Derived from Camellia Seed Cake through Enzymatic Hydrolysis
Source: MDPI journal article supplement (doi:10.3390/foods12020393), 2023-01-13
Supplement: s1 [file s1]

Supplementary Materials

# Optimization and Molecular Mechanism of Novel $\alpha$ -glucosidase Inhibitory Peptides Derived from Camellia Seed Cake through Enzymatic Hydrolysis

**Table S1.** Independent variables and code levels for the SCPH based on BBD.

| Independent variables          | Code units | Coded Levels |      |      |
|--------------------------------|------------|--------------|------|------|
|                                |            | -1           | 0    | 1    |
| Temperature ( °C )             | A          | 45           | 50   | 55   |
| pH                             | B          | 6.5          | 7    | 7.5  |
| Protease concentration ( U/g ) | C          | 2000         | 4000 | 6000 |
| Time ( h )                     | D          | 3            | 4    | 5    |

**Table S2.** RSM design and results.

| Std | Run | A:Temperature | B:pH | C:Time | D:Protease concentration | $\alpha$ -glucosidase inhibition activity/% |
|-----|-----|---------------|------|--------|--------------------------|---------------------------------------------|
| 13  | 1   | 50            | 6.5  | 3      | 4000                     | 48.16                                       |
| 4   | 2   | 55            | 7.5  | 4      | 4000                     | 51.02                                       |
| 25  | 3   | 50            | 7    | 4      | 4000                     | 58.9                                        |
| 18  | 4   | 55            | 7    | 3      | 4000                     | 54.56                                       |
| 29  | 5   | 50            | 7    | 4      | 4000                     | 59.33                                       |
| 1   | 6   | 45            | 6.5  | 4      | 4000                     | 46.61                                       |
| 20  | 7   | 55            | 7    | 5      | 4000                     | 53.91                                       |
| 27  | 8   | 50            | 7    | 4      | 4000                     | 57.42                                       |
| 12  | 9   | 55            | 7    | 4      | 6000                     | 47.96                                       |
| 9   | 10  | 45            | 7    | 4      | 2000                     | 45.94                                       |
| 10  | 11  | 55            | 7    | 4      | 2000                     | 45.46                                       |
| 8   | 12  | 50            | 7    | 5      | 6000                     | 46.85                                       |
| 28  | 13  | 50            | 7    | 4      | 4000                     | 57.39                                       |
| 15  | 14  | 50            | 6.5  | 5      | 4000                     | 49.08                                       |
| 3   | 15  | 45            | 7.5  | 4      | 4000                     | 51.32                                       |
| 26  | 16  | 50            | 7    | 4      | 4000                     | 58.82                                       |
| 22  | 17  | 50            | 7.5  | 4      | 2000                     | 38.61                                       |
| 2   | 18  | 55            | 6.5  | 4      | 4000                     | 47.99                                       |
| 21  | 19  | 50            | 6.5  | 4      | 2000                     | 35.57                                       |
| 23  | 20  | 50            | 6.5  | 4      | 6000                     | 44.35                                       |
| 17  | 21  | 45            | 7    | 3      | 4000                     | 54.65                                       |
| 16  | 22  | 50            | 7.5  | 5      | 4000                     | 52.47                                       |
| 6   | 23  | 50            | 7    | 5      | 2000                     | 40.23                                       |
| 19  | 24  | 45            | 7    | 5      | 4000                     | 52.34                                       |
| 24  | 25  | 50            | 7.5  | 4      | 6000                     | 48.1                                        |
| 11  | 26  | 45            | 7    | 4      | 6000                     | 47.33                                       |
| 14  | 27  | 50            | 7.5  | 3      | 4000                     | 51.82                                       |
| 7   | 28  | 50            | 7    | 3      | 6000                     | 47.28                                       |
| 5   | 29  | 50            | 7    | 3      | 2000                     | 42.08                                       |

**Table S3.** Details information of peptides with denovo scores > 90 used for virtual screening.

| Peptide     | Denovo Score | m/z      | Mass      | Docking score(Kcal/mol) |
|-------------|--------------|----------|-----------|-------------------------|
| LLVLYYFY    | 94           | 538.287  | 1074.5637 | -9.335                  |
| LLLLPSYSEF  | 92           | 591.3289 | 1180.6379 | -9.06                   |
| LCDQCPPHA   | 91           | 549.229  | 1096.4429 | -8.535                  |
| ATNPPCCQP   | 90           | 522.7232 | 1043.4165 | -8.868                  |
| KDDFVEKR    | 99           | 518.7742 | 1035.5349 | -8.307                  |
| TSCSSPSYPFQ | 90           | 630.7604 | 1259.5129 | -8.926                  |
| LVGDCQRY    | 95           | 505.7458 | 1009.4651 | -8.216                  |
| LDMSAERGN   | 92           | 504.7228 | 1007.4342 | -8.153                  |
| AEDLPRRC    | 93           | 508.7515 | 1015.4869 | -7.913                  |
| LKEKLPGHT   | 97           | 511.8037 | 1021.592  | -7.34                   |
| MKDAREQF    | 93           | 512.7495 | 1023.4807 | -7.076                  |
| HRLDQCR     | 94           | 513.744  | 1025.4824 | -6.68                   |
| VVRDPGSHY   | 95           | 515.2598 | 1028.5039 | -6.652                  |
| SDGSGPHHW   | 99           | 518.7155 | 1035.4158 | -6.435                  |
| RVNEGETFS   | 94           | 519.7378 | 1037.4778 | -6.325                  |
| LNHQSQNLQK  | 96           | 662.8312 | 1323.6531 | -6.325                  |
| EFNRSPYQ    | 91           | 520.7464 | 1039.4723 | -5.93                   |
| KSSSAGPSQR  | 96           | 523.7649 | 1045.5151 | -5.89                   |
| LPNYHPAPR   | 99           | 532.7872 | 1063.5562 | -5.851                  |
| AEDLRPRGC   | 98           | 537.2609 | 1072.5083 | -5.836                  |
| LLNDRETGR   | 94           | 537.2894 | 1072.5625 | -5.834                  |
| LAGNPQRQQ   | 99           | 506.2695 | 1010.5257 | -5.81                   |
| GLTQSQQCR   | 92           | 539.2593 | 1076.5032 | -5.756                  |
| QQQPTTEPR   | 91           | 542.7732 | 1083.5308 | -5.711                  |
| VVRSEAGDMK  | 96           | 546.2794 | 1090.5439 | -5.653                  |
| KGPKSDPSYN  | 90           | 546.7681 | 1091.5247 | -5.617                  |
| LYKDDFLDKR  | 92           | 656.8481 | 1311.6821 | -5.611                  |
| LTDEHGHPVQ  | 99           | 566.7731 | 1131.5308 | -5.605                  |
| PAGQDLPLNA  | 94           | 575.8112 | 1149.603  | -5.513                  |
| LLQGHDDRR   | 96           | 370.5295 | 1108.5737 | -5.478                  |
| EDAALHMPVPH | 92           | 568.2648 | 1134.5127 | -5.42                   |
| KETPAEGAPSK | 97           | 557.7904 | 1113.5667 | -5.277                  |
| TMEQQCRLQR  | 92           | 455.8883 | 1364.6289 | -5.247                  |
| QAGAQPQHRL  | 94           | 553.2961 | 1104.5789 | -5.245                  |
| LLSSSQPNTR  | 96           | 551.7962 | 1101.5779 | -5.238                  |
| EHGHDTLPVQ  | 94           | 378.1844 | 1131.5308 | -5.201                  |
| VTGKQPPGAEQ | 97           | 556.2906 | 1110.5669 | -5.156                  |
| LAGNPQRQAGQ | 98           | 570.2983 | 1138.5842 | -5.136                  |
| NEMTAGKLNLR | 95           | 575.2912 | 1148.5608 | -5.089                  |
| LAGNQPHQQQ  | 95           | 560.777  | 1119.542  | -5.006                  |
| SSDTLDNVKAK | 95           | 589.3074 | 1176.5986 | -4.927                  |
| VDEETAAANPR | 95           | 586.7804 | 1171.5469 | -4.922                  |
| EDYGNPPRKT  | 97           | 588.7856 | 1175.5571 | -4.864                  |
| LRDPEREEQ   | 97           | 586.2878 | 1170.5627 | -4.765                  |

---

|              |    |          |           |        |
|--------------|----|----------|-----------|--------|
| RLHQNLDER    | 95 | 394.2095 | 1179.6108 | -4.729 |
| TDELLSNDHNQ  | 93 | 643.285  | 1284.5581 | -4.72  |
| CSSPSYTRDQ   | 97 | 600.7509 | 1199.4878 | -4.633 |
| VSEETTTVGKR  | 91 | 603.8195 | 1205.6252 | -4.622 |
| TEESVTTGVKR  | 90 | 402.8821 | 1205.6252 | -4.603 |
| LFPEKGSPPKSQ | 93 | 609.3295 | 1216.645  | -4.561 |
| LKEKLPNHKD   | 99 | 611.3502 | 1220.6877 | -4.345 |
| LSPSTDCSKVH  | 98 | 615.793  | 1229.571  | -3.679 |

---
